# Supplementary material for: The deubiquitinating enzymes-related signature predicts the prognosis and immunotherapy response in breast cancer
Source: publisher site journal article supplement (doi:10.18632/aging.206010), 2024-07-09
Supplement: Supplementary file [file aging-v16i15-206010-supplementary-material-SD1.pdf]

SUPPLEMENTARY FIGURES

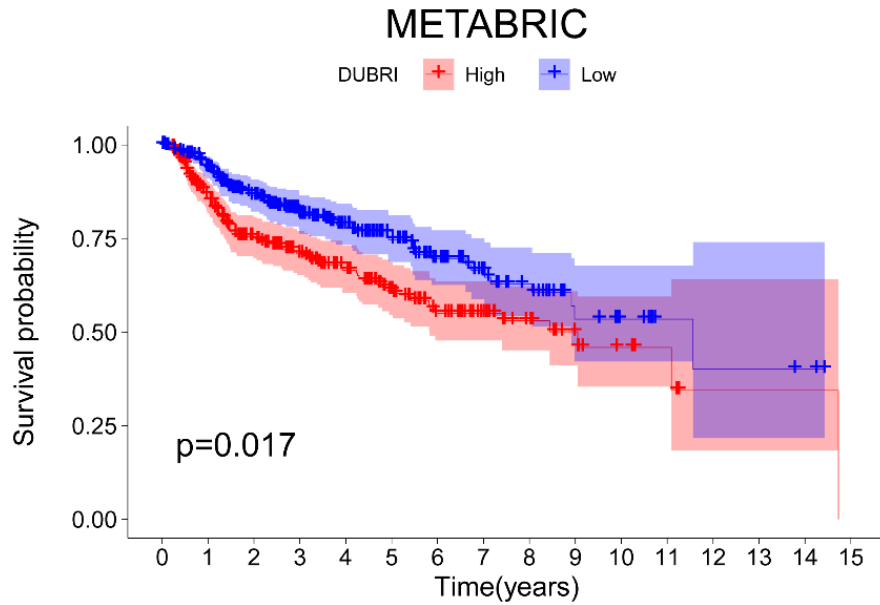

Supplementary Figure 1. Kaplan-Meier survival curves comparing high/low DUBRI for METABRIC dataset.

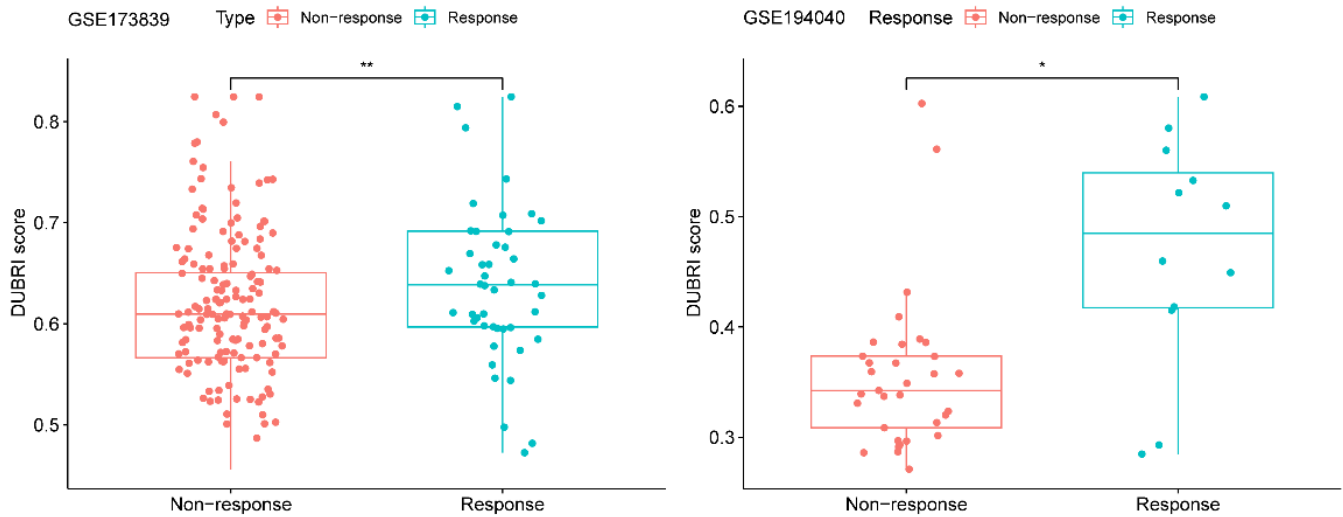

Supplementary Figure 2. External immunotherapy datasets GSE173839 and GSE194040 validate DUBRI for predicting immunotherapy response.
