# Supplementary material for: The deubiquitinating enzymes-related signature predicts the prognosis and immunotherapy response in breast cancer
Source: publisher site journal article supplement (doi:10.18632/aging.206010), 2024-07-09
Supplement: Supplementary file [file aging-v16i15-206010-supplementary-material-SD2.pdf]

## SUPPLEMENTARY TABLES

**Supplementary Table 1. Deubiquitinating enzyme genes.**

---

|        |          |
|--------|----------|
| CYLD   | USP26    |
| USPL1  | USP29    |
| PAN2   | USP37    |
| USP53  | USP22    |
| USP54  | MINDY1   |
| USP1   | MINDY2   |
| USP10  | MINDY3   |
| USP39  | MINDY4   |
| USP11  | ZUP1     |
| USP15  | OTUD1    |
| USP4   | OTUD4    |
| USP8   | OTUD4P1  |
| USP19  | OTULIN   |
| USP2   | OTULINL  |
| USP21  | OTUD5    |
| USP50  | OTUD3    |
| USP20  | OTUD6A   |
| USP33  | OTUD6B   |
| USP12  | YOD1     |
| USP46  | OTUB1    |
| USP27X | OTUB2    |
| USP51  | OTUD7A   |
| USP3   | OTUD7B   |
| USP44  | TNFAIP3  |
| USP49  | ZRANB1   |
| USP35  | VCPIP1   |
| USP38  | BRCC3    |
| USP18  | COPS5    |
| USP41  | PSMD14   |
| USP24  | MPND     |
| USP9X  | MYSM1    |
| USP9Y  | STAMBP   |
| USP34  | STAMBPL1 |
| USP47  | PRPF8    |
| USP7   | COPS6    |
| USP48  | EIF3F    |
| USP40  | PSMD7    |
| USP14  | EIF3H    |
| USP30  | ATXN3    |
| USP16  | ATXN3L   |
| USP45  | JOSD1    |
| USP31  | JOSD2    |
| USP43  | BAP1     |
| USP32  | UCHL5    |
| USP6   | UCHL1    |
| USP13  | UCHL3    |
| USP5   |          |
| USP25  |          |
| USP28  |          |

---

**Supplementary Table 2. The clinical characteristics of breast cancer samples in the TCGA training set, GSE20685, and GSE88770 validation sets.**

| <b>Characteristics</b>        | <b>TCGA cohort</b> | <b>GSE20685 cohort</b> | <b>GSE88770 cohort</b> |
|-------------------------------|--------------------|------------------------|------------------------|
| <b>n</b>                      | 1049               | 327                    | 117                    |
| <b>Age, n (%)</b>             |                    |                        |                        |
| ≤65                           | 756 (72.1%)        | 305 (93.3%)            | /                      |
| >65                           | 293 (27.9%)        | 22 (6.7%)              | /                      |
| <b>WHO stage, n (%)</b>       |                    |                        |                        |
| I                             | 183 (17.5%)        | /                      | /                      |
| II                            | 592 (56.4%)        |                        |                        |
| III                           | 233 (22.2%)        |                        |                        |
| IV                            | 18 (1.7%)          |                        |                        |
| X                             | 12 (1.1%)          |                        |                        |
| Unknown                       | 11 (1.1%)          |                        |                        |
| <b>T stage, n (%)</b>         |                    |                        |                        |
| T1                            | 280 (26.7%)        | 101 (30.9%)            | /                      |
| T2                            | 599 (57.1%)        | 188 (57.5%)            |                        |
| T3                            | 132 (12.6%)        | 26 (7.9%)              |                        |
| T4                            | 35 (3.3%)          | 12 (3.7%)              |                        |
| TX                            | 3 (0.3%)           |                        |                        |
| <b>N stage, n (%)</b>         |                    |                        |                        |
| N0                            | 491 (46.8%)        | 137 (41.9%)            | /                      |
| N1                            | 356 (34.0%)        | 87 (26.6%)             |                        |
| N2                            | 110 (10.5%)        | 63 (19.3%)             |                        |
| N3                            | 75 (7.1%)          | 40 (12.2%)             |                        |
| NX                            | 17 (1.6%)          |                        |                        |
| <b>M stage, n (%)</b>         |                    |                        |                        |
| M0                            | 867 (82.7%)        | 319 (97.6%)            | /                      |
| M1                            | 20 (1.9%)          | 8 (2.4%)               |                        |
| MX                            | 162 (15.4%)        |                        |                        |
| <b>Survival status, n (%)</b> |                    |                        |                        |
| Alive                         | 898 (85.6%)        | 244 (74.6%)            | /                      |
| Dead                          | 151 (14.4%)        | 83 (25.4%)             | /                      |
